# Supplementary material for: Smoking and salivary microbiota: a cross-sectional analysis of an Italian alpine population
Source: PubMed Central journal article supplement (PMC10622503; doi:10.1038/s41598-023-42474-7), 2023-11-02
Supplement: 41598_2023_42474_MOESM1_ESM.pdf [file 41598_2023_42474_MOESM1_ESM.pdf]

# Smoking and salivary microbiota, a cross-sectional analysis of an Italian alpine population

## Supplementary Figures and Tables

Giacomo Antonello, Freida Blostein, Deesha Bhaumik, Elyse Davis,  
Martin Gögele, Roberto Melotti, Peter Pramstaller, Cristian Pattaro,  
Nicola Segata, Betsy Foxman, Christian Fuchsberger

2023-08-20

## Contents

|                                                                                                                                               |           |
|-----------------------------------------------------------------------------------------------------------------------------------------------|-----------|
| <b>Phyloseq Object used for the analyses (ASV level)</b>                                                                                      | <b>1</b>  |
| <b>Supplementary Figures</b>                                                                                                                  | <b>2</b>  |
| Supplementary Figure 1 - Differentially Abundant genera in comparable literature . . . . .                                                    | 2         |
| Supplementary Figure 2 - Tooth loss vs Age and Smoking . . . . .                                                                              | 3         |
| Supplementary Figure 3 - Barplots of Phylum and Genus level salivary microbiota composition in the CHRISMB population . . . . .               | 4         |
| Supplementary Figure 4 - Alpha diversity and richness in relation to smoking status . . . . .                                                 | 5         |
| Supplementary Figure 5 - Sex specific differentially abundant genera with Smoking . . . . .                                                   | 7         |
| Supplementary Figure 6 - Correlations log2 Fold Change values from Differential abundance and regression on daily smoking intensity . . . . . | 8         |
| Supplementary Figure 7 - Correlation of differentially abundant pathways . . . . .                                                            | 9         |
| Supplementary Figure 8 - Gram staining relative abundances vs Smoking habits . . . . .                                                        | 10        |
| Supplementary Figure 9 - Current (NR) are indistinguishable from Current (R) . . . . .                                                        | 11        |
| Supplementary Figure 10 - Histogram of grams per day in current smokers . . . . .                                                             | 12        |
| <b>Supplementary Tables</b>                                                                                                                   | <b>13</b> |
| Supplementary Table 1 - Literature overview, table of ethnicities and sample size of studies . . . .                                          | 13        |
| Supplementary Table 2 - Available samples after each exclusion step . . . . .                                                                 | 13        |
| Supplementary Table 3 - No statistical differences between excluded and included participants for the study . . . . .                         | 14        |
| Supplementary Table 4 - Per taxonomic level microbiota statistics . . . . .                                                                   | 15        |
| Supplementary Table 5 - PERMANOVA table of variables included in the models (marginal effect)                                                 | 15        |
| Supplementary Table 6 - Linear model aerobes against smoking intensity per day . . . . .                                                      | 16        |

|                                                                                                  |    |
|--------------------------------------------------------------------------------------------------|----|
| Supplementary Table 7 - Linear model anaerobes against smoking intensity per day . . . . .       | 16 |
| Supplementary Table 8 - Linear model aerobes against years since smoking cessation . . . . .     | 16 |
| Supplementary Table 9 - Linear model anaerobes against years since smoking cessation . . . . .   | 17 |
| Supplementary Table 10 - Table 1 with Current smokers split into reducers and non-reducers . . . | 17 |
| Supplementary Table 11 - eHOMD database expansion, list of genomes accession numbers per species | 18 |

## Phyloseq Object used for the analyses (ASV level)

**Unfiltered Phyloseq Object** (Starting point, never used in the analyses)

```

phyloseq-class experiment-level object
otu_table() OTU Table: [ 11860 taxa and 1923 samples ]:
sample_data() Sample Data: [ 1923 samples by 1505 sample variables ]:
tax_table() Taxonomy Table: [ 11860 taxa by 8 taxonomic ranks ]:
phy_tree() Phylogenetic Tree: [ 11860 tips and 11858 internal nodes ]:
refseq() DNASTringSet: [ 11860 reference sequences ]
taxa are rows

```

**Filtered Taxa and samples.** This was the phyloseq used for the actual analyses For further details, see Suppl. Tables 2 and 4

```

phyloseq-class experiment-level object
otu_table() OTU Table: [ 622 taxa and 1601 samples ]:
sample_data() Sample Data: [ 1601 samples by 1505 sample variables ]:
tax_table() Taxonomy Table: [ 622 taxa by 8 taxonomic ranks ]:
phy_tree() Phylogenetic Tree: [ 622 tips and 621 internal nodes ]:
refseq() DNASTringSet: [ 622 reference sequences ]
taxa are rows

```

## Supplementary Figures

### Supplementary Figure 1 - Differentially Abundant genera in comparable literature

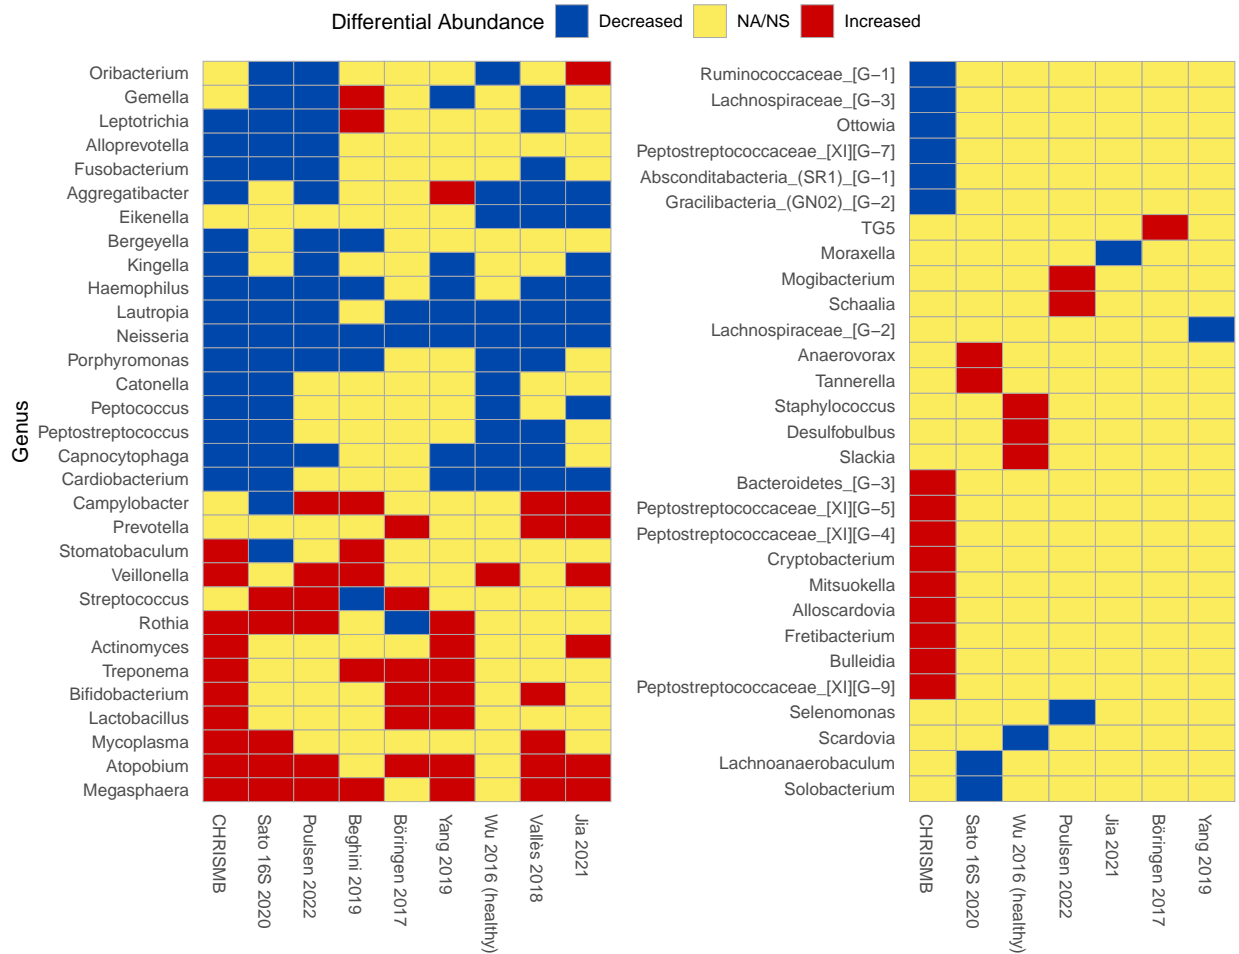

**Supplementary Figure 1. Heatmap of differentially abundant genera in smokers compared to non-smokers both in the literature and in the current study (CHRISMB).** Genera were manually annotated based on publications with comparable setup: cross-sectional studies on a healthy population, and 16S amplicon microbiota data. **Red** color indicates increased abundance in smokers, **Blue** means decreased abundance in smokers. **Yellow** means not significant (NS) or not mentioned (NA) in the text nor in the supplementary materials. **(Left)** Commonly reported genera (present in at least 3 studies). **(Right)** Rarely reported genera (present in only one study).

## Supplementary Figure 2 - Tooth loss vs Age and Smoking

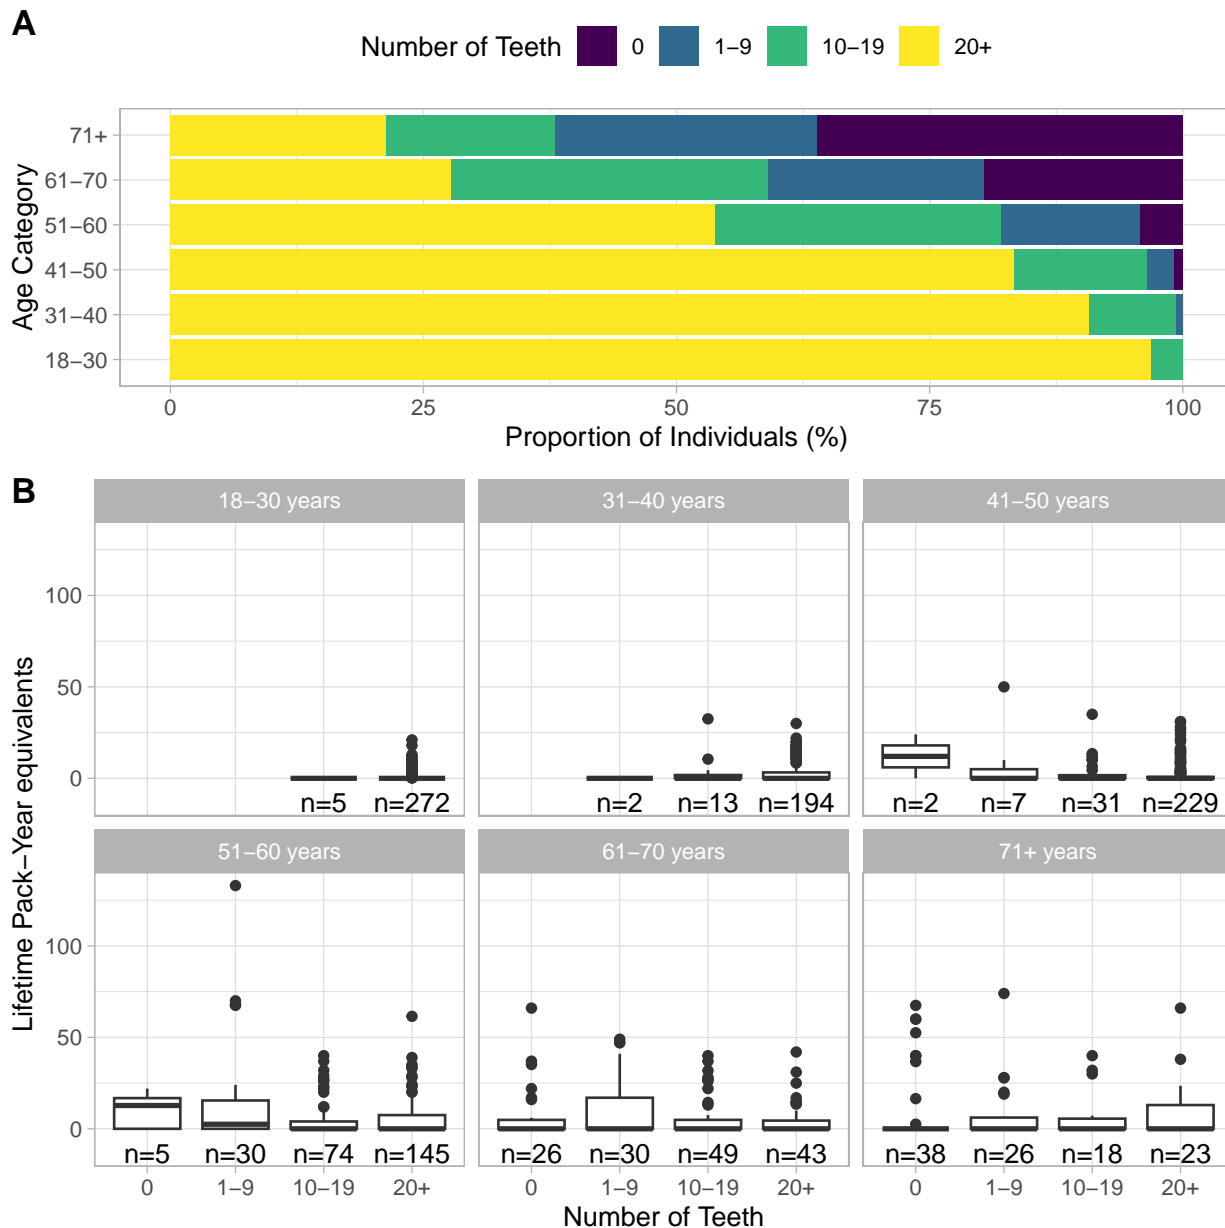

**Supplementary Figure 2: Non-independence of number of teeth from age groups and smoking**  
 (A) Relationship between age and number of teeth. Numbers are reported as proportions for each age category. (B) Relationship between lifetime exposure to smoke (lifetime pack-years) and the number of teeth in only current smokers. Individuals were further split into age groups to control for age-related tooth loss. Lifetime pack years, a proxy of a lifetime exposure to the tobacco smoked, were calculated in Former and Current smokers as follows:

$$\text{Lifetime Pack-Year equivalents} = \frac{\text{cigarettes}}{20} \times 365 \text{ days} \times \text{years smoked}$$

Supplementary Figure 3 - Barplots of Phylum and Genus level salivary microbiota composition in the CHRISMB population

**A** Phylum

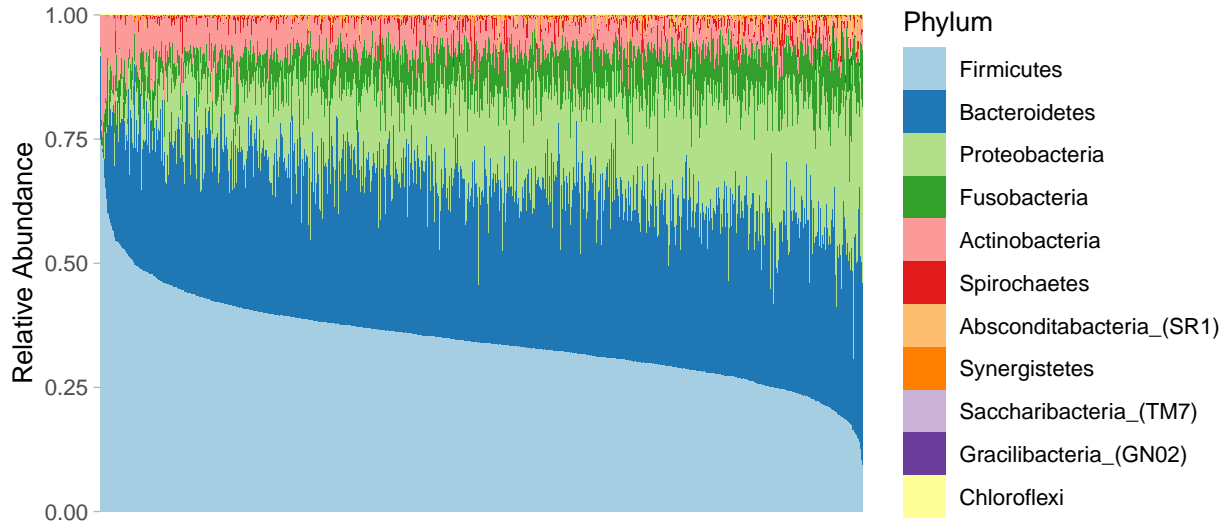

**B** Genus

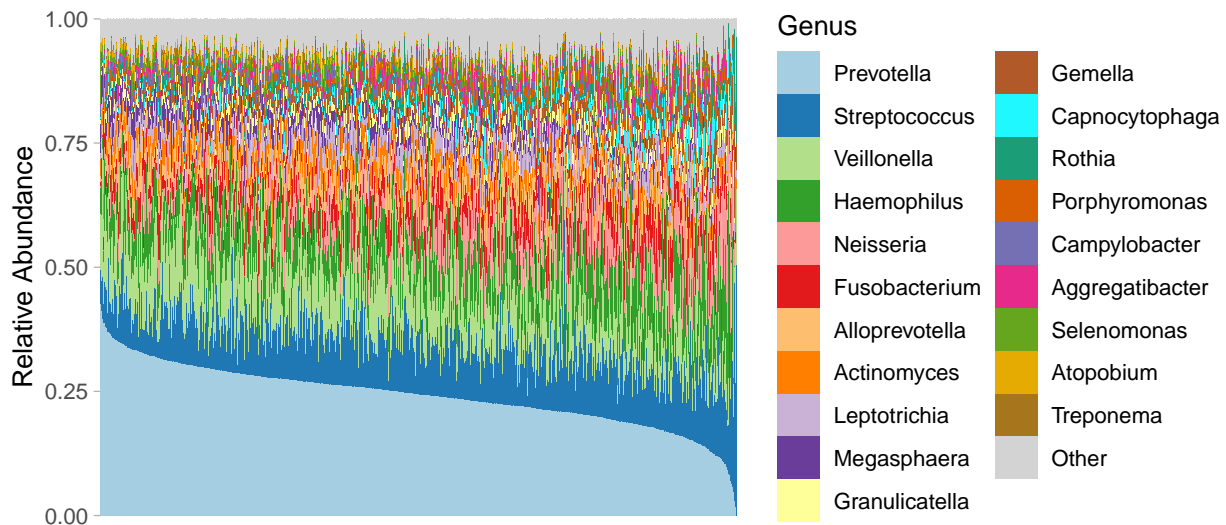

**Supplementary Figure 3. Barplots of relative abundance composition of CHRISMB samples included in this study (N = 1601)** Each bar is a sample. Samples were sorted from left to right based on the decreasing relative abundance of the most abundant taxa overall (A) Phylum level, samples were sorted by decreasing abundance of Firmicutes; (B) Genus level, samples were sorted by decreasing abundance of Prevotella.

Supplementary Figure 4 - Alpha diversity and richness in relation to smoking status

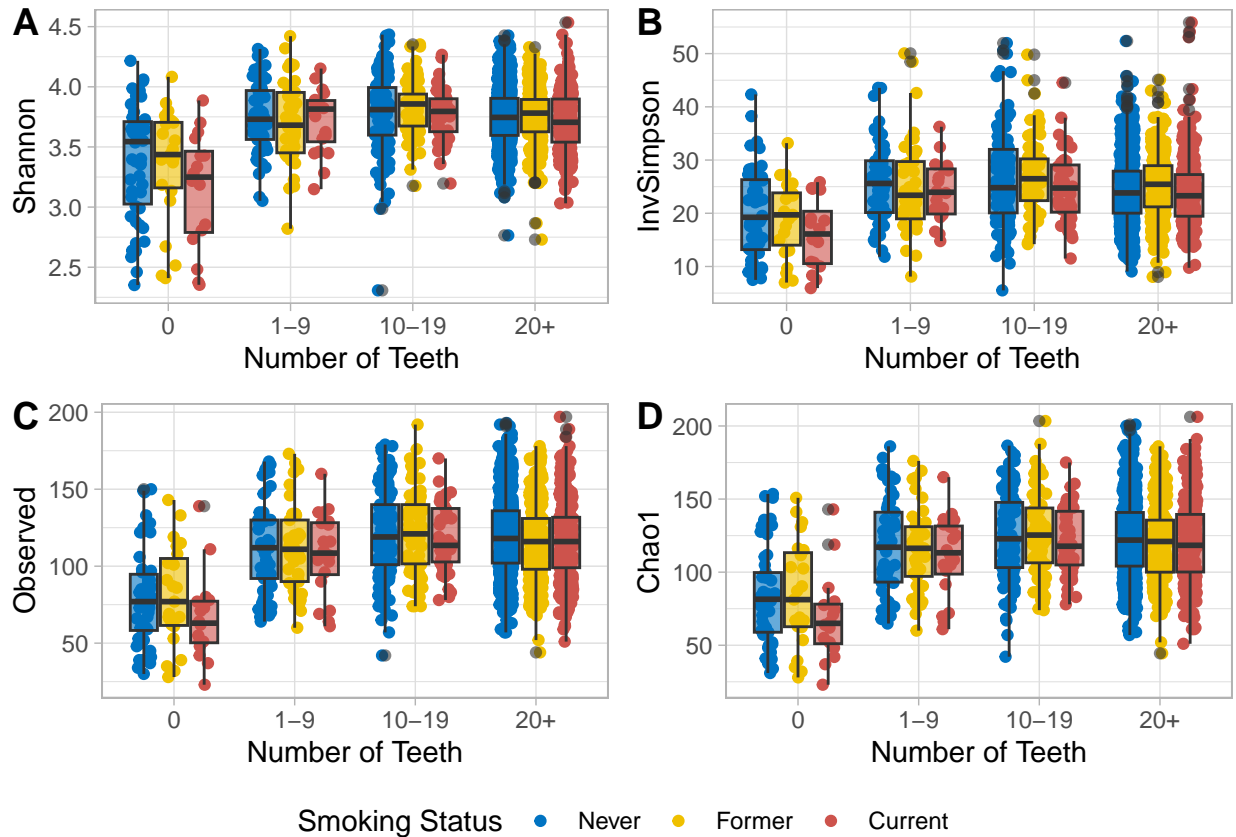

Supplementary Figure 4. Alpha diversity and richness estimates in relation to smoking (colours) subdivided by the number of teeth (x axis) (A) Shannon diversity; (B) Inverse Simpson diversity; (C) Observed number of taxa; (D) Chao 1 Richness. Estimates were calculated on samples rarefied to 5000 counts per sample.

Table 1: Shannon Diversity/Richness metric in relation to other variables considered in the study. Significance was estimated with the ‘stats::lm’ linear regression function modeling each alpha metric against the following variables in the model: age, sex, Number of Teeth, Smoking Status. No, transformation was applied to any variable considered

| term                    | estimate | std.error | statistic | p.value |
|-------------------------|----------|-----------|-----------|---------|
| Intercept               | 3.24     | 0.05      | 67.79     | <2e-16  |
| Smoking Status: Former  | 0.00     | 0.02      | -0.04     | 0.966   |
| Smoking Status: Current | -0.03    | 0.02      | -1.82     | 0.068   |
| Number of Teeth: 1-9    | 0.40     | 0.04      | 10.65     | <2e-16  |
| Number of Teeth: 10-19  | 0.49     | 0.03      | 14.22     | <2e-16  |
| Number of Teeth: 20+    | 0.46     | 0.03      | 13.77     | <2e-16  |
| Age                     | 0.00     | 0.00      | 3.24      | 0.001   |
| Sex: Female             | -0.02    | 0.01      | -1.19     | 0.233   |

Table 2: InvSimpson Diversity/Richness metric in relation to other variables considered in the study. Significance was estimated with the ‘stats::lm’ linear regression function modeling each alpha metric against the following variables in the model: age, sex, Number of Teeth, Smoking Status. No, transformation was applied to any variable considered

| term                    | estimate | std.error | statistic | p.value |
|-------------------------|----------|-----------|-----------|---------|
| Intercept               | 15.84    | 1.20      | 13.22     | <2e-16  |
| Smoking Status: Former  | 0.30     | 0.42      | 0.73      | 0.46    |
| Smoking Status: Current | -0.45    | 0.45      | -1.00     | 0.32    |
| Number of Teeth: 1-9    | 6.36     | 0.95      | 6.70      | 3e-11   |
| Number of Teeth: 10-19  | 7.77     | 0.86      | 9.06      | <2e-16  |
| Number of Teeth: 20+    | 6.91     | 0.84      | 8.24      | 3e-16   |
| Age                     | 0.05     | 0.01      | 4.15      | 3e-05   |
| Sex: Female             | -0.70    | 0.34      | -2.04     | 0.04    |

Table 3: Observed Diversity/Richness metric in relation to other variables considered in the study. Significance was estimated with the ‘stats::lm’ linear regression function modeling each alpha metric against the following variables in the model: age, sex, Number of Teeth, Smoking Status. No, transformation was applied to any variable considered

| term                    | estimate | std.error | statistic | p.value |
|-------------------------|----------|-----------|-----------|---------|
| Intercept               | 76.87    | 4.65      | 16.55     | <2e-16  |
| Smoking Status: Former  | -1.64    | 1.61      | -1.01     | 0.31    |
| Smoking Status: Current | -3.25    | 1.73      | -1.89     | 0.06    |
| Number of Teeth: 1-9    | 34.38    | 3.68      | 9.34      | <2e-16  |
| Number of Teeth: 10-19  | 43.55    | 3.33      | 13.10     | <2e-16  |
| Number of Teeth: 20+    | 41.05    | 3.25      | 12.63     | <2e-16  |
| Age                     | 0.02     | 0.05      | 0.44      | 0.66    |
| Sex: Female             | 0.33     | 1.32      | 0.25      | 0.80    |

Table 4: Chao1 Diversity/Richness metric in relation to other variables considered in the study. Significance was estimated with the ‘stats::lm’ linear regression function modeling each alpha metric against the following variables in the model: age, sex, Number of Teeth, Smoking Status. No, transformation was applied to any variable considered

| term                    | estimate | std.error | statistic | p.value |
|-------------------------|----------|-----------|-----------|---------|
| Intercept               | 81.42    | 4.94      | 16.49     | <2e-16  |
| Smoking Status: Former  | -1.70    | 1.72      | -0.99     | 0.32    |
| Smoking Status: Current | -3.41    | 1.83      | -1.86     | 0.06    |
| Number of Teeth: 1-9    | 34.74    | 3.91      | 8.88      | <2e-16  |
| Number of Teeth: 10-19  | 43.90    | 3.53      | 12.42     | <2e-16  |
| Number of Teeth: 20+    | 41.12    | 3.45      | 11.90     | <2e-16  |
| Age                     | 0.00     | 0.05      | 0.08      | 0.94    |
| Sex: Female             | 0.40     | 1.41      | 0.29      | 0.77    |

Supplementary Figure 5 - Sex specific differentially abundant genera with Smoking

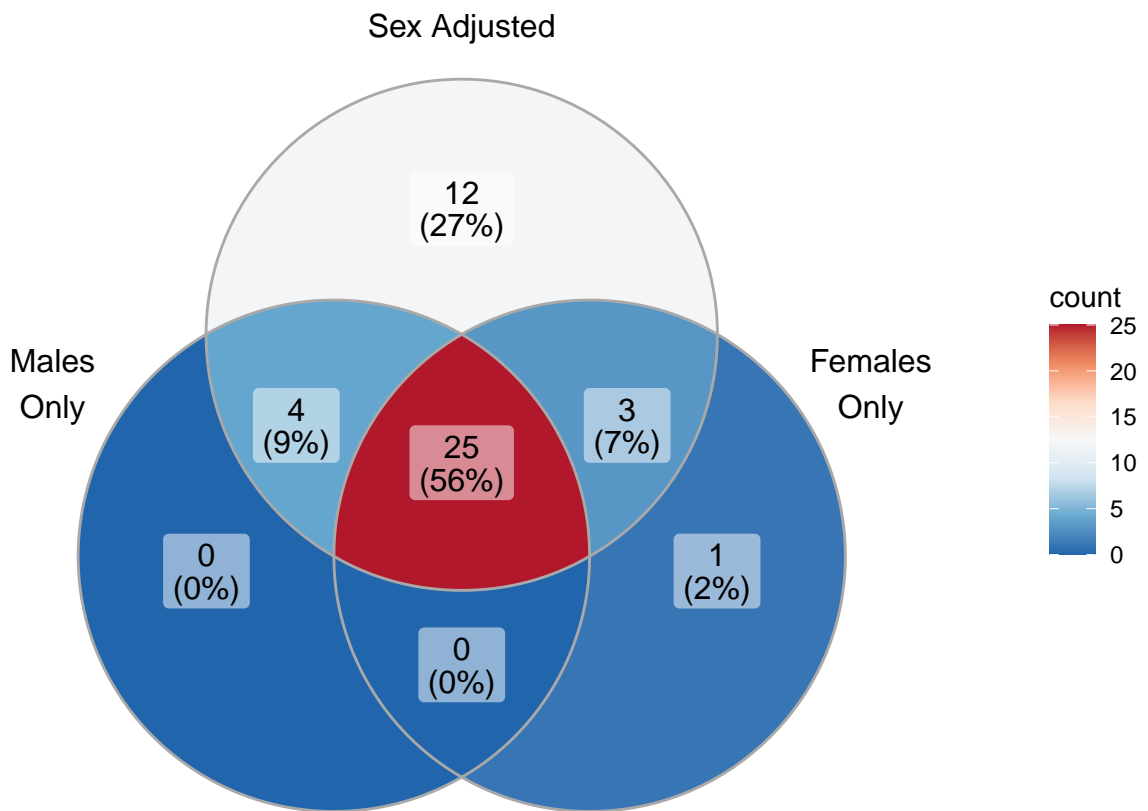

**Supplementary Figure 5. Some genera are exclusively significant in sex-separated models, but are all found in the sex-adjusted significant genera.** Venn diagram of the significant genera found in each of the three models. In all cases, the contrast chosen was Current/Never, adjusting for age and number of teeth. All significance thresholds were q-values < 0.05, all Benjamini-Hochberg (5% FDR) except for ALDEx2, which uses Holm correction.



Supplementary Figure 6 - Correlations log<sub>2</sub> Fold Change values from Differential abundance and regression on daily smoking intensity

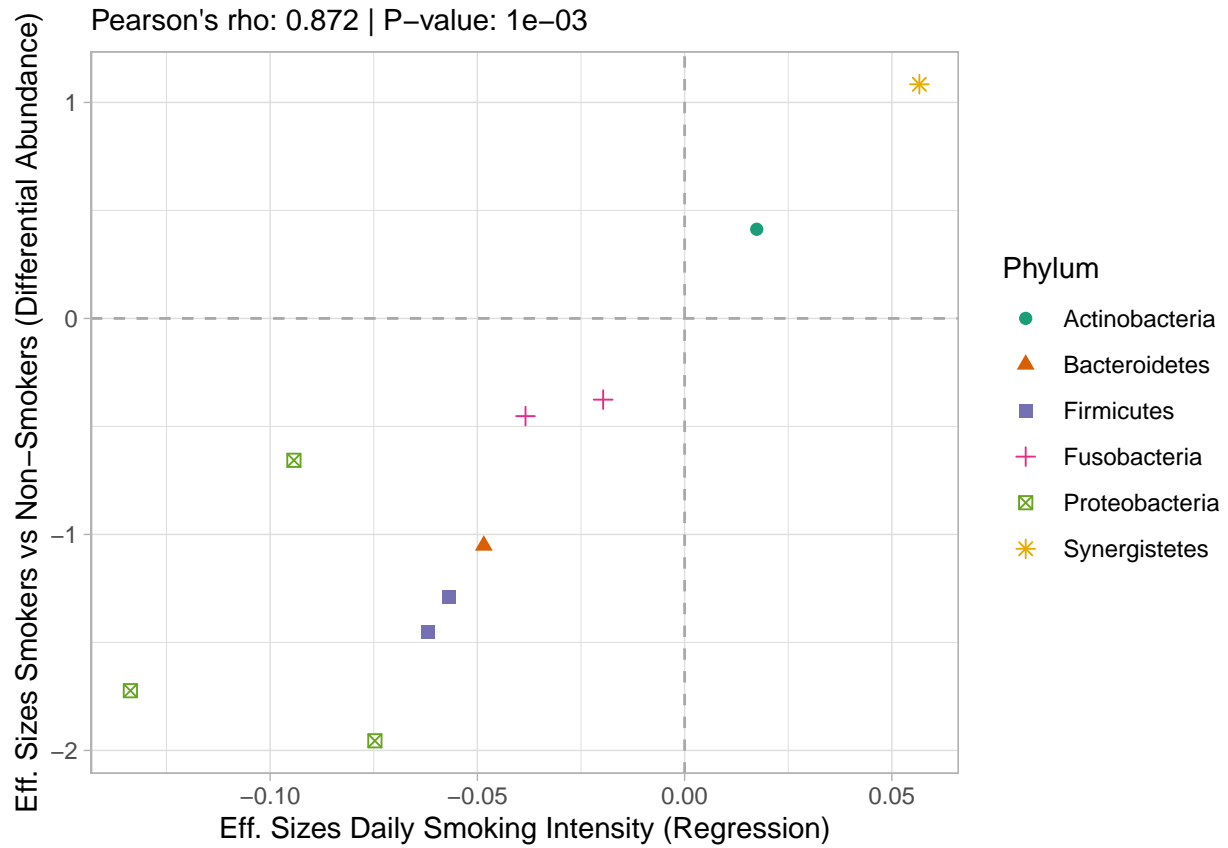

**Supplementary Figure 6. Scatterplot and correlation index between effect size estimates in the differential abundance contrasting Current over Never smokers and the effect size estimates for the regression of genera abundance in relation to the daily grams of tobacco smoked daily.** Both methods used DESeq2 regression correcting for age group, sex, number of teeth. However, in the comparison between Current and Never smokers, a contrast between factors was extracted (log<sub>2</sub> Fold Change), in the second case the estimates were step-wise fold change estimates in response to increasing 5 grams smoked per day (0, 5, 10, . . . , 30 g).

## Supplementary Figure 7 - Correlation of differentially abundant pathways

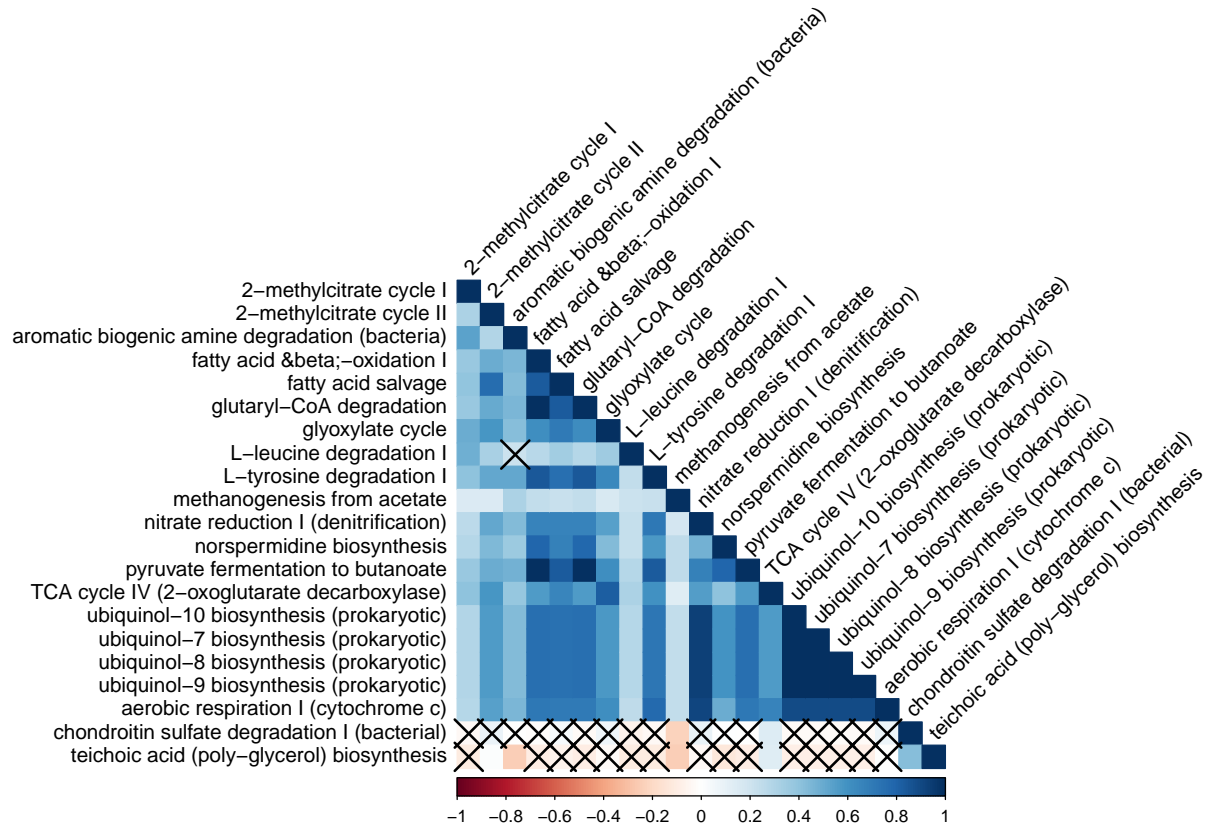

**Supplementary Figure 7. Correlation among pathways that were found differentially abundant in smokers compared to never smokers.** Pathways were transformed to relative abundance to account for compositionality, and a pairwise Spearman correlation matrix was calculated with the `Hmisc::rcorr` function, which additionally reports a P-value as indication of the strength of the correlation estimate. Blue circles are **positive** correlations, red circles are **negative** correlations. Larger circles mean a stronger correlation. Crossed-out slots are non-significant associations ( $p \geq 0.01$ ).

Supplementary Figure 8 - Gram staining relative abundances vs Smoking habits

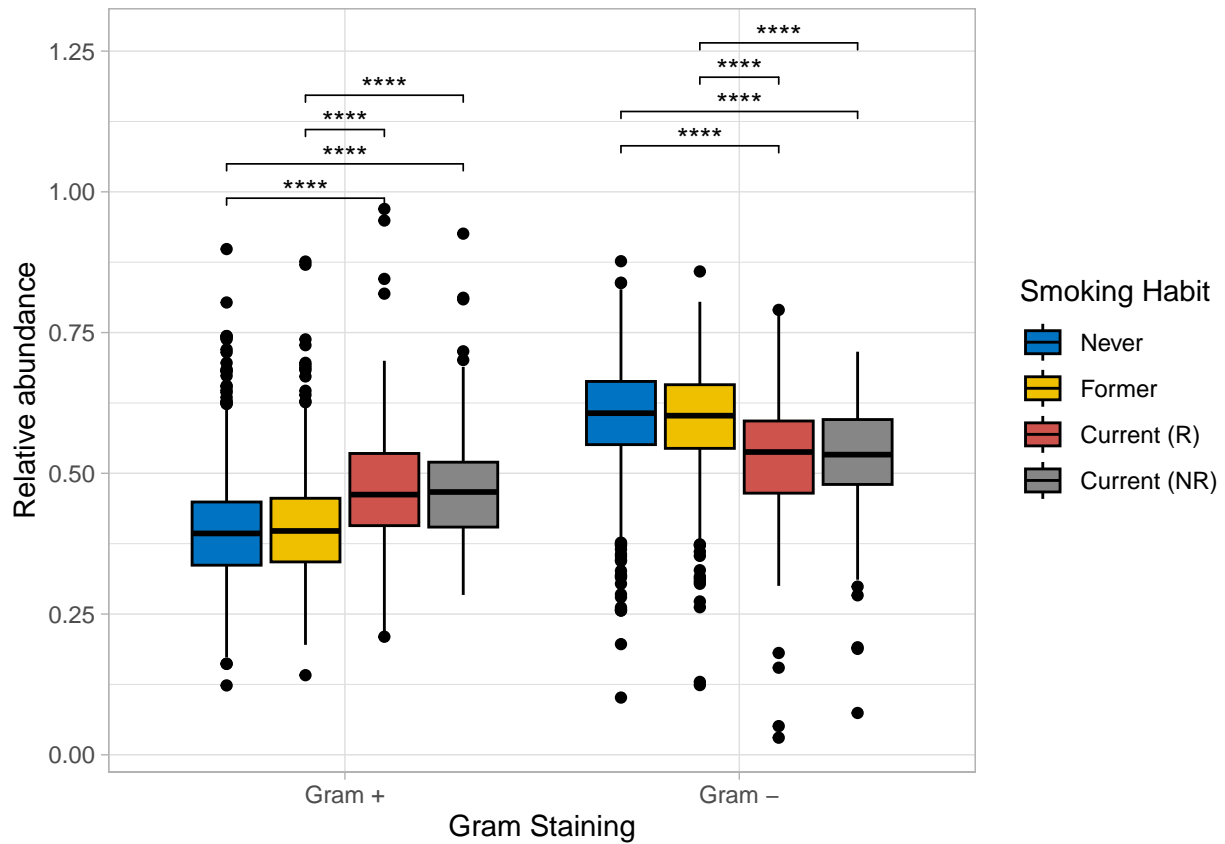

Supplementary Figure 8 - Gram Positive bacteria are more abundant in the saliva of smokers, regardless of reduction. Phyla were annotated based on a manually curated table made by G.A., since Gram staining generally differentiates at phylum level. The results were presented like the oxygen metabolism on Figure 1 (Main Text) and Supplementary Figure 6-B.

## Supplementary Figure 9 - Current (NR) are indistinguishable from Current (R)

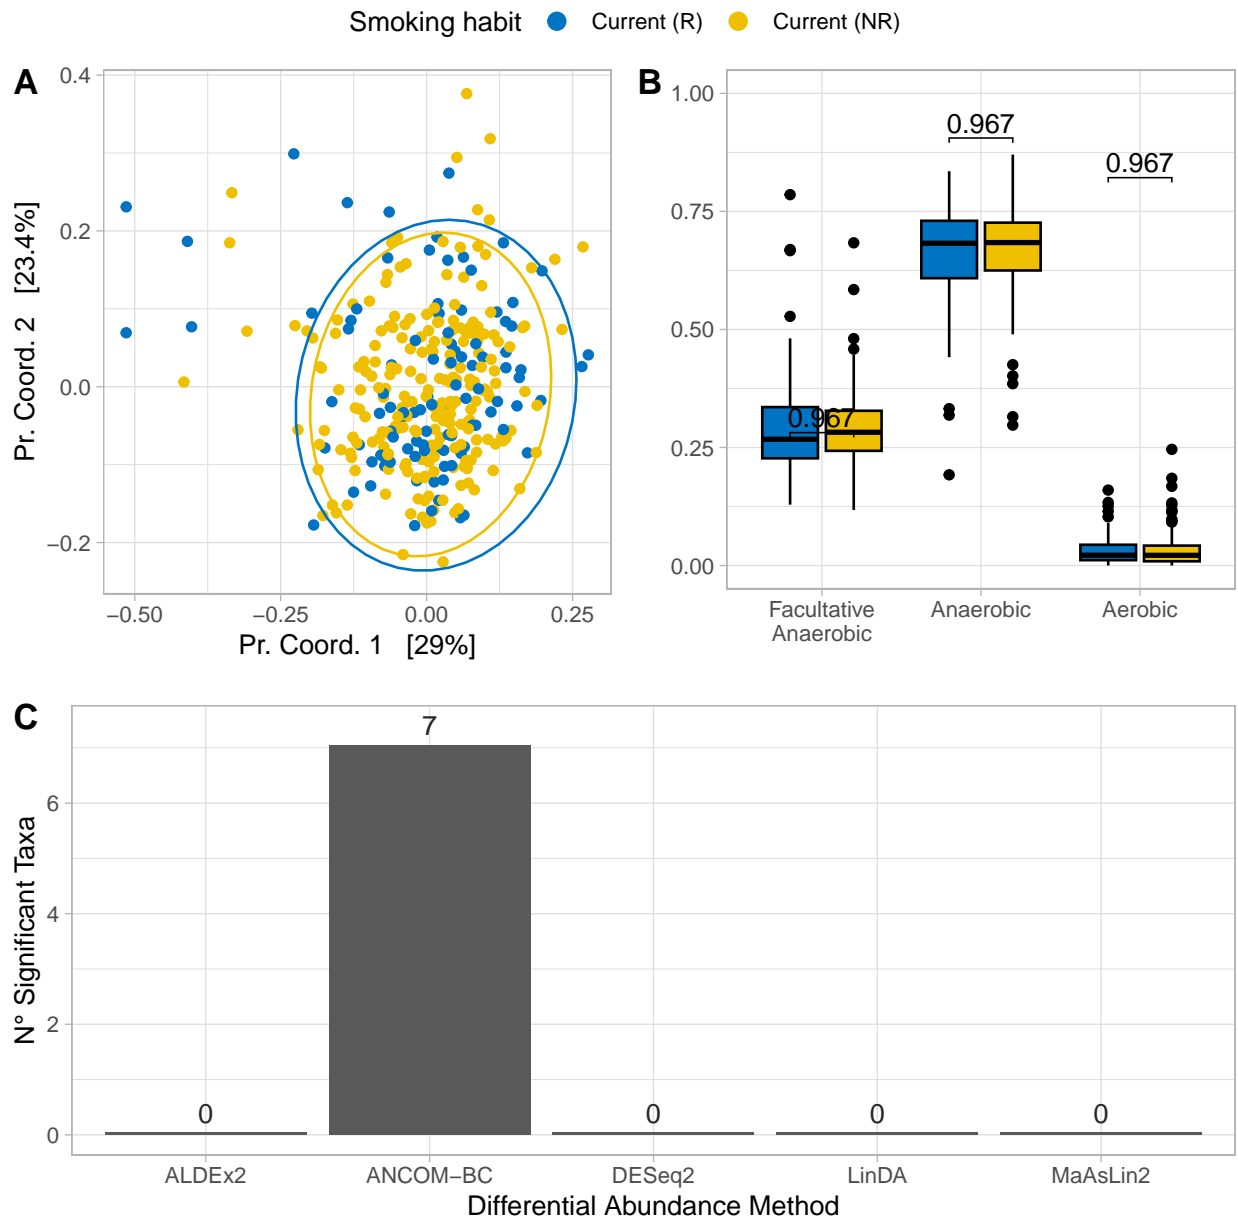

**Supplementary Figure 9. Current smokers who reduced daily smoking in the past, Current (R), are indistinguishable from Current smokers who never reduced daily smoking, Current (NR)** (A) Bray-Curtis distance based Principal Coordinate Analysis (PCoA) of the first 2 axes. Ellipses were drawn after the 95% confidence interval of the area covered by each smoker group. (B) Relative abundance of aerobes, anaerobes, and facultative anaerobes in Current (R) and Current (NR) smokers. Statistical significance was calculated with pairwise Wilcoxon test adjusting p-values (q-values) for a 5% FDR with the Benjamini-Hochberg method (\*\*  $q < 0.05$ ; \*\*\*  $q < 0.001$ , \*\*\*\*  $q < 0.0001$ ). (C) Barplot of the number of differentially abundant taxa in the  $\frac{Current(NR)}{Current(R)}$  contrast using 5 different methods (See main text for the methods). Each method considered a significant results if Benjamini-Hochberg corrected q-values were lower than 0.05, at a False Discovery Rate of 0.05, the only exception was ALDEx2, which implements only Holm's correction.

Supplementary Figure 10 - Histogram of grams per day in current smokers

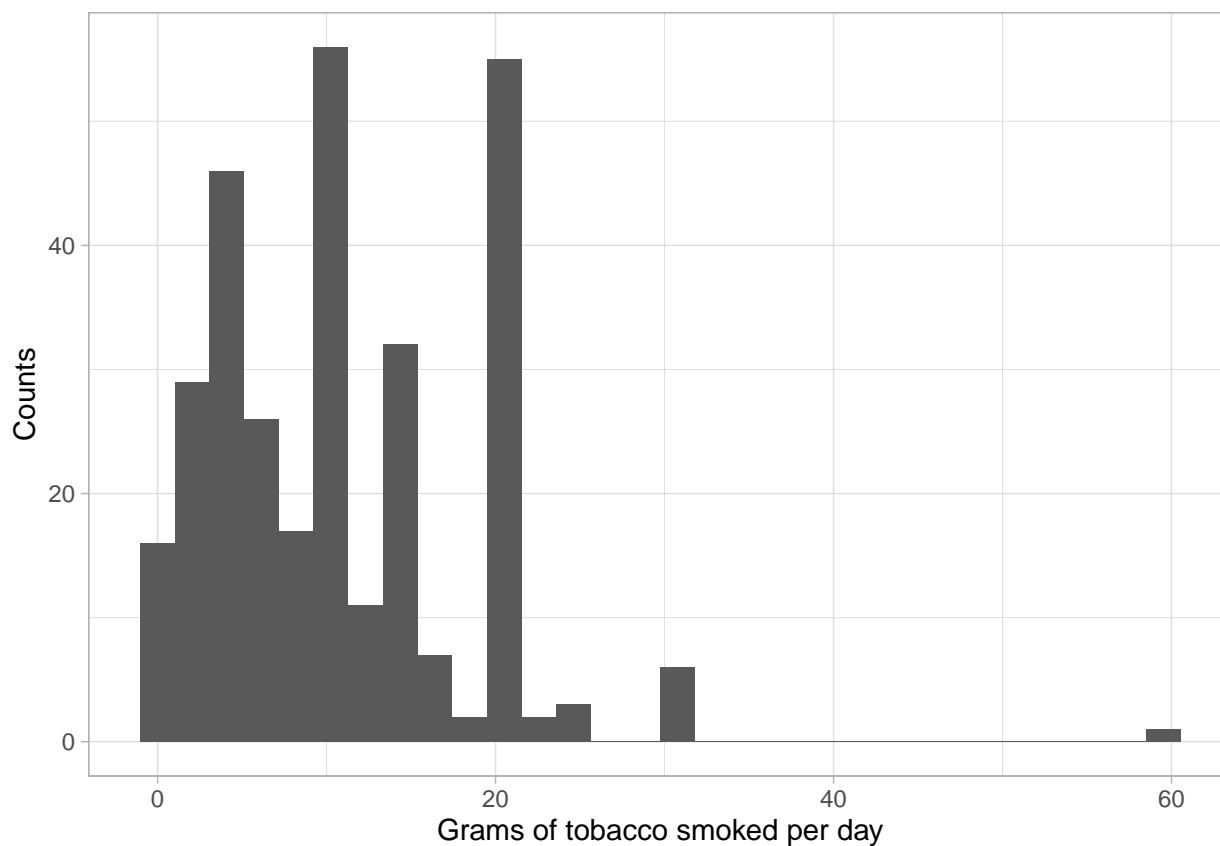

**Supplementary Figure 10. Histogram of grams of tobacco smoked per day by CHRISMB smokers (N = 309)** Tobacco is an integration of cigarettes, cigars, cigarillos and pipe. However, except 5 participants, all smokers were exclusively cigarette smokers. The participant who declared smoking 60 cigarettes (~ 60 grams) per day was included in this graph for completeness, but excluded from the analysis.

## Supplementary Tables

### Supplementary Table 1 - Literature overview, table of ethnicities and sample size of studies

**Supplementary Table 1. High-level comparison of studies with comparable design** Only studies investigating cigarette smoking association with the salivary microbiota and 16S amplicon sequencing technology were included.

| <b>Ethnicity</b>            | <b>Country of cohort</b> | <b>Sample size</b> | <b>Reference</b>                   |
|-----------------------------|--------------------------|--------------------|------------------------------------|
| European                    | United States            | 1204               | Wu et al. 2016                     |
| Japanese                    | Japan                    | 2343               | Takeshita et al. 2016              |
| Unknown                     | United States            | 363                | Börnigen et al. 2017               |
| Middle-East                 | Saudi Arabia             | 330                | Vallès et al. 2018                 |
| Mostly European             | United States            | 259                | Beghini et al. 2019                |
| Low-income African American | United States            | 1616               | Yang et al. 2019                   |
| Eastern Asia                | Eastern Asia             | 657                | Sato, Kakuta, Uchino, et al. 2020b |
| Eastern Asia                | China                    | 316                | Jia et al. 2021                    |
| European                    | Denmark                  | 746                | Poulsen et al. 2022                |

### Supplementary Table 2 - Available samples after each exclusion step

| <b>Criterion</b>                      | <b>Samples Excluded (N)</b> | <b>Samples after exclusion (N)</b> |
|---------------------------------------|-----------------------------|------------------------------------|
| Missing Smoking Status                | 4                           | 1919                               |
| Missing Number of Teeth               | 44                          | 1875                               |
| Missing Antibiotic Usage Information  | 83                          | 1792                               |
| Took Antibiotics in the last 3 months | 191                         | 1601                               |

**Supplementary Table 3 - No statistical differences between excluded and included participants for the study**

**Supplementary Table 3. Statistical differences between excluded and included participants in the study.** Significance (p-value column) was calculated as Welch’s t-test for continuous variables, Fisher exact test for 2x2 comparisons, and Pearson’s Chi squared test for multiclass factors. Abbreviations used: BP = Blood pressure; BMI = Body Mass Index.

| <b>Characteristic</b>      | <b>excluded, N = 322</b> | <b>included, N = 1,601</b> | <b>p-value</b> |
|----------------------------|--------------------------|----------------------------|----------------|
| Smoking Habit              |                          |                            | 0.5            |
| Never                      | 172 (54%)                | 880 (55%)                  |                |
| Former                     | 90 (28%)                 | 395 (25%)                  |                |
| Current (R)                | 17 (5.3%)                | 100 (6.2%)                 |                |
| Current (NR)               | 39 (12%)                 | 226 (14%)                  |                |
| Unknown                    | 4                        | 0                          |                |
| Antibiotics Usage          | 193 (85%)                | 0 (0%)                     | <0.001         |
| Unknown                    | 95                       | 0                          |                |
| Systolic BP                | 128 (17)                 | 126 (14)                   | 0.12           |
| Unknown                    | 22                       | 138                        |                |
| Diastolic BP               | 79 (10)                  | 78 (9)                     | 0.088          |
| Unknown                    | 22                       | 138                        |                |
| BMI                        | 26.0 (4.7)               | 25.7 (4.5)                 | 0.3            |
| N° Teeth                   |                          |                            | 0.4            |
| 0                          | 19 (6.8%)                | 89 (5.6%)                  |                |
| 1-9                        | 21 (7.6%)                | 118 (7.4%)                 |                |
| 10-19                      | 51 (18%)                 | 239 (15%)                  |                |
| 20+                        | 187 (67%)                | 1,155 (72%)                |                |
| Unknown                    | 44                       | 0                          |                |
| Gum Health (self-assessed) |                          |                            | 0.9            |
| Excellent                  | 11 (3.9%)                | 79 (5.5%)                  |                |
| Very good                  | 64 (23%)                 | 331 (23%)                  |                |
| Good                       | 99 (35%)                 | 502 (35%)                  |                |
| Average                    | 88 (31%)                 | 412 (29%)                  |                |
| Poor                       | 16 (5.7%)                | 93 (6.5%)                  |                |
| Very poor                  | 2 (0.7%)                 | 11 (0.8%)                  |                |
| Unknown                    | 42                       | 173                        |                |

<sup>1</sup> n (%); Mean (SD)

<sup>2</sup> Pearson’s Chi-squared test; Welch Two Sample t-test; Fisher’s exact test

## Supplementary Table 4 - Per taxonomic level microbiota statistics

Supplementary Table 4. CHRISMB total reads and total taxonomic ranks before and after filtering by prevalence and detection with the function ‘microbiome::core’.

|                                    | Unfiltered | Filtered |
|------------------------------------|------------|----------|
| Thresholds of Prevalence Detection | - -        | 0.01 10  |
| Number of Reads                    | 4.41e+07   | 4.34e+07 |
| Kingdom                            | 2          | 1        |
| Phylum                             | 13         | 11       |
| Class                              | 28         | 21       |
| Order                              | 46         | 30       |
| Family                             | 79         | 43       |
| Genus                              | 165        | 82       |
| Species                            | 11826      | 606      |
| ASV                                | 11860      | 622      |

## Supplementary Table 5 - PERMANOVA table of variables included in the models (marginal effect)

Supplementary Table 5. Permutational (x2000) Multivariate Analysis of variance (PERMANOVA) of the marginal effect of age, sex, smoking and number of teeth in the compositional variability of the microbiota. Interindividual microbiota-based dissimilarity was calculated with the Bray-Curtis method on counts transformed to relative abundances (Total Sum Scaling, ranging from 0 to 1). The Beta dispersity (Tuckey post-hoc test significance) was  $P = 0.126$ .

| Term                   | Deg.Freedom | SumOfSquares | R2 (%) | F-stat | P-value |
|------------------------|-------------|--------------|--------|--------|---------|
| Number of Teeth        | 3           | 1.9          | 2.4    | 14.4   | 5e-04   |
| Sex                    | 1           | 0.2          | 0.3    | 5.4    | 1e-03   |
| Age Category           | 5           | 1.4          | 1.8    | 6.5    | 5e-04   |
| Smoking habits (3 cat) | 2           | 2.8          | 3.6    | 31.7   | 5e-04   |
| Residuals              | 1589        | 69.5         | 89.7   | NA     | NA      |
| Total                  | 1600        | 77.5         | 100.0  | NA     | NA      |



**Supplementary Table 6 - Linear model aerobes against smoking intensity per day**

**Supplementary Table 6. The relative abundance of AEROBIC bacteria decreases with increasing grams of tobacco smoked in a day.** The trend is true up to 10 g/day, after which a plateau is reached.

| term                                 | estimate | std.error | statistic | p.value |
|--------------------------------------|----------|-----------|-----------|---------|
| Intercept                            | -0.007   | 0.012     | -0.598    | 0.550   |
| 1/tobacco exposure intensity (g/day) | 0.027    | 0.008     | 3.545     | 0.000   |
| Age                                  | 0.000    | 0.000     | 1.579     | 0.115   |
| Sex                                  | 0.005    | 0.004     | 1.322     | 0.187   |
| 1-9 teeth                            | 0.004    | 0.011     | 0.331     | 0.741   |
| 10-19 teeth                          | 0.024    | 0.009     | 2.571     | 0.011   |
| 20+ teeth                            | 0.024    | 0.009     | 2.645     | 0.009   |

**Supplementary Table 7 - Linear model anaerobes against smoking intensity per day**

**Supplementary Table 7. The relative abundance of ANAEROBIC bacteria decreases with increasing grams of tobacco smoked per day.** The trend is true up to 10 g/day, after which a plateau is reached.

| term                                 | estimate | std.error | statistic | p.value |
|--------------------------------------|----------|-----------|-----------|---------|
| Intercept                            | 0.611    | 0.035     | 17.244    | 0.000   |
| 1/tobacco exposure intensity (g/day) | -0.020   | 0.022     | -0.941    | 0.347   |
| Age                                  | -0.001   | 0.000     | -2.562    | 0.011   |
| Sex                                  | -0.002   | 0.010     | -0.228    | 0.820   |
| 1-9 teeth                            | 0.129    | 0.030     | 4.272     | 0.000   |
| 10-19 teeth                          | 0.102    | 0.027     | 3.844     | 0.000   |
| 20+ teeth                            | 0.111    | 0.026     | 4.252     | 0.000   |

**Supplementary Table 8 - Linear model aerobes against years since smoking cessation**

**Supplementary Table 8. The relative abundance of AEROBIC bacteria increases with increasing years since smoking cessation.** The trend reaches a plateau after 20 years, it is no longer statistically associated (data not shown)

| term                 | estimate | std.error | statistic | p.value |
|----------------------|----------|-----------|-----------|---------|
| Intercept            | 0.024    | 0.024     | 0.995     | 0.321   |
| Years since quitting | 0.001    | 0.001     | 1.944     | 0.053   |
| Age                  | 0.000    | 0.000     | 1.022     | 0.308   |
| Sex                  | 0.002    | 0.006     | 0.359     | 0.720   |
| 1-9 teeth            | 0.029    | 0.017     | 1.703     | 0.090   |
| 10-19 teeth          | 0.025    | 0.017     | 1.494     | 0.137   |
| 20+ teeth            | 0.020    | 0.016     | 1.254     | 0.211   |

## Supplementary Table 9 - Linear model anaerobes against years since smoking cessation

**Supplementary Table 9. The relative abundance of ANAEROBIC bacteria increases with increasing years since smoking cessation.** The trend reaches a plateau after 20 years, it is no longer statistically associated (data not shown)

| term                 | estimate | std.error | statistic | p.value |
|----------------------|----------|-----------|-----------|---------|
| Intercept            | 0.024    | 0.024     | 0.995     | 0.321   |
| Years since quitting | 0.001    | 0.001     | 1.944     | 0.053   |
| Age                  | 0.000    | 0.000     | 1.022     | 0.308   |
| Sex                  | 0.002    | 0.006     | 0.359     | 0.720   |
| 1-9 teeth            | 0.029    | 0.017     | 1.703     | 0.090   |
| 10-19 teeth          | 0.025    | 0.017     | 1.494     | 0.137   |
| 20+ teeth            | 0.020    | 0.016     | 1.254     | 0.211   |

## Supplementary Table 10 - Table 1 with Current smokers split into reducers and non-reducers

**Supplementary Table 10. Demographics of CHRISMB cohort, in South Tyrol, Italy, with respect to smoking habit.** Per-column percentages were also reported in brackets. Current smokers were separated into smokers who reduced daily smoking dosage some time in the past - Current (R), and those who did not reduce - Current (NR). The whole cohort is included under the “CHRISMB” column. Significance is calculated as X<sup>2</sup> test for categorical variables”

|                                    | Never<br>(N=880) | Former<br>(N=395) | Current (R)<br>(N=100) | Current (NR)<br>(N=226) | CHRISMB<br>(N=1601) | X <sup>2</sup> p-value |
|------------------------------------|------------------|-------------------|------------------------|-------------------------|---------------------|------------------------|
| <b>Sex</b>                         |                  |                   |                        |                         |                     |                        |
| Male                               | 356 (40.5%)      | 222 (56.2%)       | 58 (58.0%)             | 115 (50.9%)             | 751 (46.9%)         | 5.1e-07                |
| Female                             | 524 (59.5%)      | 173 (43.8%)       | 42 (42.0%)             | 111 (49.1%)             | 850 (53.1%)         |                        |
| <b>Age Category (years)</b>        |                  |                   |                        |                         |                     | 2.2e-17                |
| 18-30                              | 238 (27.0%)      | 41 (10.4%)        | 38 (38.0%)             | 92 (40.7%)              | 409 (25.5%)         |                        |
| 31-40                              | 139 (15.8%)      | 73 (18.5%)        | 18 (18.0%)             | 39 (17.3%)              | 269 (16.8%)         |                        |
| 41-50                              | 196 (22.3%)      | 75 (19.0%)        | 23 (23.0%)             | 41 (18.1%)              | 335 (20.9%)         |                        |
| 51-60                              | 144 (16.4%)      | 112 (28.4%)       | 12 (12.0%)             | 39 (17.3%)              | 307 (19.2%)         |                        |
| 61-70                              | 93 (10.6%)       | 57 (14.4%)        | 8 (8.0%)               | 15 (6.6%)               | 173 (10.8%)         |                        |
| 71+                                | 70 (8.0%)        | 37 (9.4%)         | 1 (1.0%)               | 0 (0%)                  | 108 (6.7%)          |                        |
| <b>N° Teeth (self-reported)</b>    |                  |                   |                        |                         |                     | 0.11                   |
| 0                                  | 50 (5.7%)        | 23 (5.8%)         | 7 (7.0%)               | 9 (4.0%)                | 89 (5.6%)           |                        |
| 1-9                                | 57 (6.5%)        | 41 (10.4%)        | 4 (4.0%)               | 16 (7.1%)               | 118 (7.4%)          |                        |
| 10-19                              | 117 (13.3%)      | 74 (18.7%)        | 13 (13.0%)             | 35 (15.5%)              | 239 (14.9%)         |                        |
| 20+                                | 656 (74.5%)      | 257 (65.1%)       | 76 (76.0%)             | 166 (73.5%)             | 1155 (72.1%)        |                        |
| <b>Gums Health (self-reported)</b> |                  |                   |                        |                         |                     | 0.44                   |
| Excellent                          | 45 (5.1%)        | 18 (4.6%)         | 4 (4.0%)               | 12 (5.3%)               | 79 (4.9%)           |                        |
| Very good                          | 188 (21.4%)      | 79 (20.0%)        | 20 (20.0%)             | 44 (19.5%)              | 331 (20.7%)         |                        |
| Good                               | 291 (33.1%)      | 124 (31.4%)       | 30 (30.0%)             | 57 (25.2%)              | 502 (31.4%)         |                        |
| Average                            | 229 (26.0%)      | 84 (21.3%)        | 27 (27.0%)             | 72 (31.9%)              | 412 (25.7%)         |                        |
| Poor                               | 47 (5.3%)        | 24 (6.1%)         | 9 (9.0%)               | 13 (5.8%)               | 93 (5.8%)           |                        |
| Very poor                          | 6 (0.7%)         | 2 (0.5%)          | 3 (3.0%)               | 0 (0%)                  | 11 (0.7%)           |                        |
| Missing                            | 74 (8.4%)        | 64 (16.2%)        | 7 (7.0%)               | 28 (12.4%)              | 173 (10.8%)         |                        |

**Supplementary Table 11 - eHOMD database expansion, list of genomes accession numbers per species**

**Supplementary Table 11. Genome accession numbers (NCBI codes) for each species added to the eHOMD reference database.** The 16S rRNA genes of each genome were added to the locally downloaded extended Human Oral Microbiome Database (eHOMD) in order to maximize the likelihood of species level taxonomic assignment.

| <b>Species</b>                     | <b>NCBI Reference Sequences</b>                                              |
|------------------------------------|------------------------------------------------------------------------------|
| <i>Acinetobacter haemolyticus</i>  | NR_026207.1, NR_117622.1, NR_119359.1                                        |
| <i>Actinomyces naeslundii</i>      | NR_037033.1, NR_113326.1, NR_118900.1                                        |
| <i>Actinomyces oris</i>            | NR_117358.1, NR_113060.1, NR_104896.1                                        |
| <i>Cardiobacterium hominis</i>     | NR_025934.1                                                                  |
| <i>Corynebacterium matruchotii</i> | NR_119179.1, NR_026216.1                                                     |
| <i>Lactobacillus casei</i>         | NR_118976.1, NR_115322.1, NR_113333.1, NR_115534.1, NR_041893.1              |
| <i>Lactobacillus fermentum</i>     | NR_118978.1, NR_113335.1, NR_104927.1                                        |
| <i>Lactobacillus rhamnosus</i>     | NR_113332.1, NR_043408.1                                                     |
| <i>Neisseria flavescens</i>        | NR_025892.1                                                                  |
| <i>Neisseria sicca</i>             | NR_121688.1                                                                  |
| <i>Neisseria subflava</i>          | NR_041989.1                                                                  |
| <i>Prevotella melaninogenica</i>   | NR_042843.1, NR_102895.1, NR_113113.1, NR_042843.1, NR_102895.1              |
| <i>Prevotella pleuritidis</i>      | NR_041541.1                                                                  |
| <i>Prevotella salivae</i>          | NR_024816.1, NR_024815.1                                                     |
| <i>Rothia mucilaginosa</i>         | NR_044873.1                                                                  |
| <i>Streptococcus mitis</i>         | NR_115560.1, NR_116207.1, NR_115732.1, NR_115240.1, NR_028664.1              |
| <i>Streptococcus mutans</i>        | NR_118933.1, NR_115733.1, NR_116208.1, NR_114726.1, NR_113641.1, NR_042772.1 |
| <i>Streptococcus oralis</i>        | NR_115734.1, NR_116210.1, NR_114413.1, NR_042927.1, NR_118234.1, NR_117719.1 |
| <i>Streptococcus sobrinus</i>      | NR_118935.1, NR_114727.1, NR_042773.1                                        |
